# Supplementary material
Source: publisher figshare collection journal article supplement (https://acs.figshare.com/ndownloader/files/7383352)
Supplement: Supplementary file 1 [file 7383352]

## **Gate- and Light-Tunable pn Heterojunction Microwire Arrays Fabricated via Evaporative Assembly**

Jae Hoon Park,<sup>1</sup> Jong Su Kim,<sup>1</sup> Young Jin Choi,<sup>1</sup> Wi Hyoung Lee,<sup>3</sup> Dong Yun Lee,<sup>4</sup> Jeong Ho Cho<sup>1,2\*</sup>

<sup>1</sup>SKKU Advanced Institute of Nanotechnology (SAINT), <sup>2</sup>School of Chemical Engineering, Sungkyunkwan University, Suwon 440–746, Korea.

<sup>3</sup>Department of Organic and Nano System Engineering, Konkuk University, Seoul 05029, Korea.

<sup>4</sup>Department of Polymer Science and Engineering, Kyungpook National University, Daegu, 41566, Korea.

\*Corresponding author: [jhcho94@skku.edu](mailto:jhcho94@skku.edu)

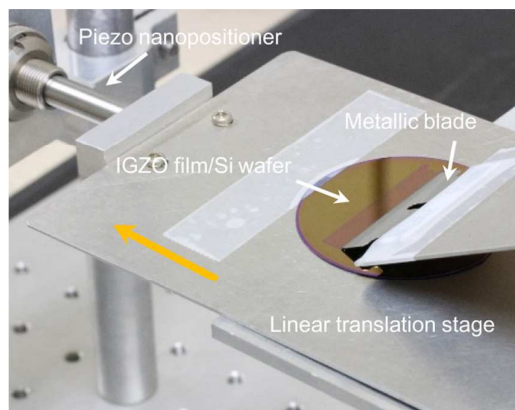

**Figure S1.** Photographic images of flow-coating setup.

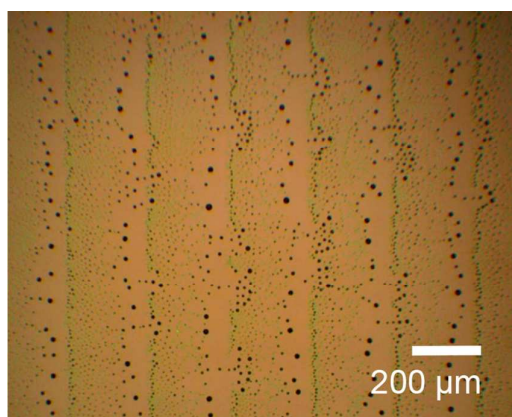

**Figure S2.** Optical microscopy image of the TIPS-PEN microwire fabricated using only TIPS-PEN solution without PMMA.

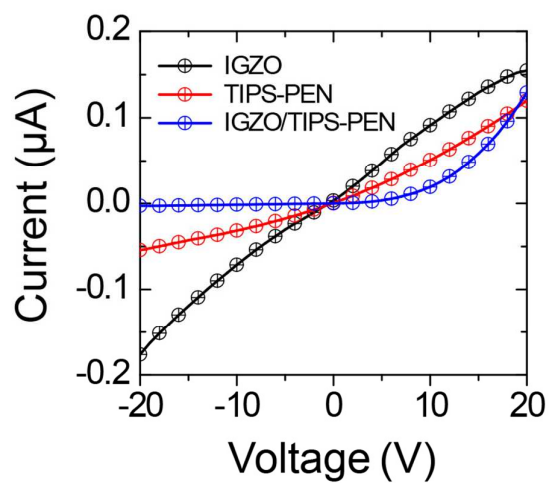

**Figure S3.** Current-voltage characteristics of the IGZO microwire, the TIPS-PEN microwire, and the IGZO/TIPS-PEN heterojunction.

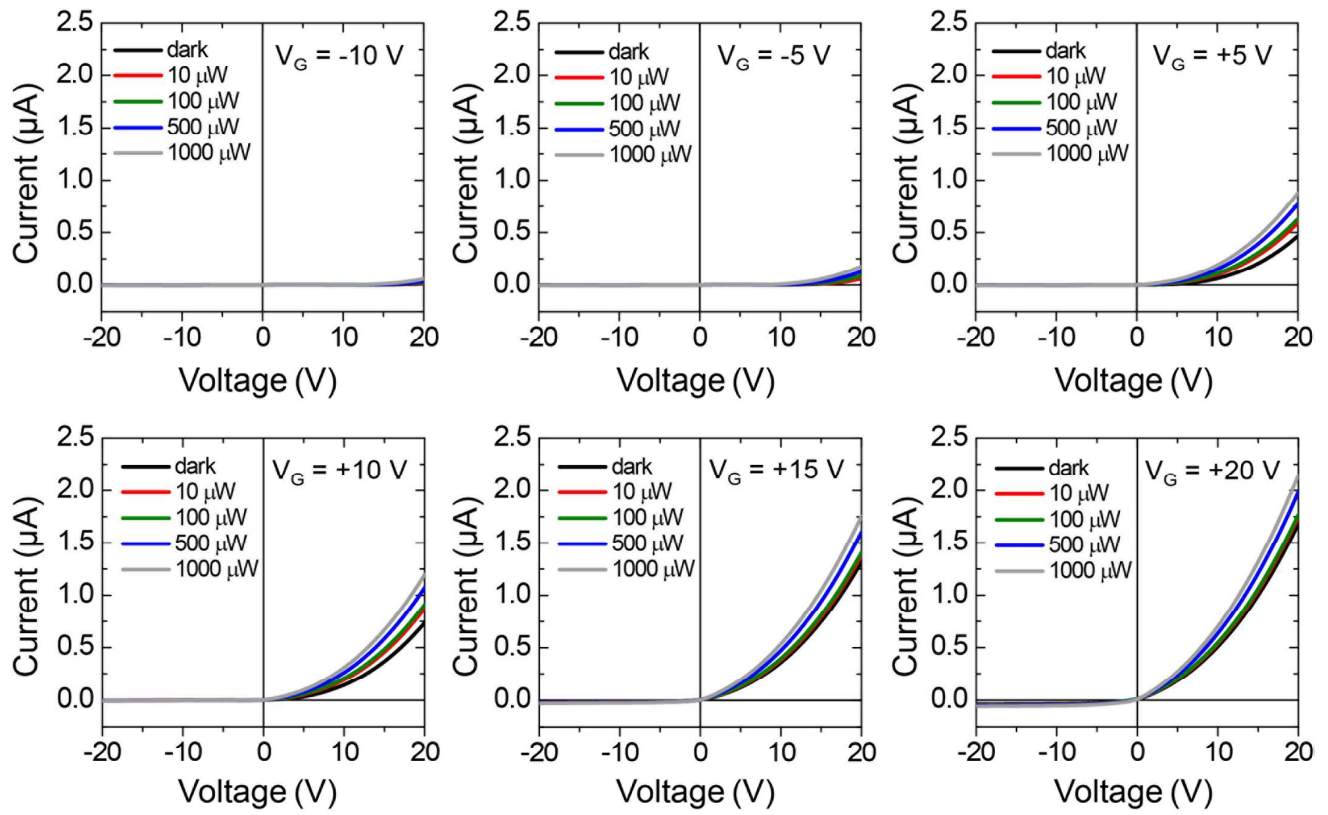

**Figure S4.** Illumination power-dependent current-voltage characteristics of the cross-stacked pn heterojunction diodes at various gate voltages ( $V_G = -10, -5, +5, +10, +15$ , and  $+20$  V) under light illumination with a fixed wavelength of 650 nm.
